# Supplementary material for: Anticholinesterase and Pro-dopaminergic Effects of Instant Coffee
Source: Preprints.org preprint supplement (doi:10.20944/preprints202209.0287.v1), 2022-09-20
Supplement: Supplementary file 1 [file supplementary]

Archive with 3 entries (3 files):
- Fig S3.pdf
- Fig S1.pdf
- Fig S2.pdf
