# Supplementary material for: Anticholinesterase and Pro-dopaminergic Effects of Instant Coffee
Source: Preprints.org preprint supplement (doi:10.20944/preprints202209.0287.v1), 2022-09-20
Supplement: Supplementary file 1 [file supplementary › Fig S1.pdf]

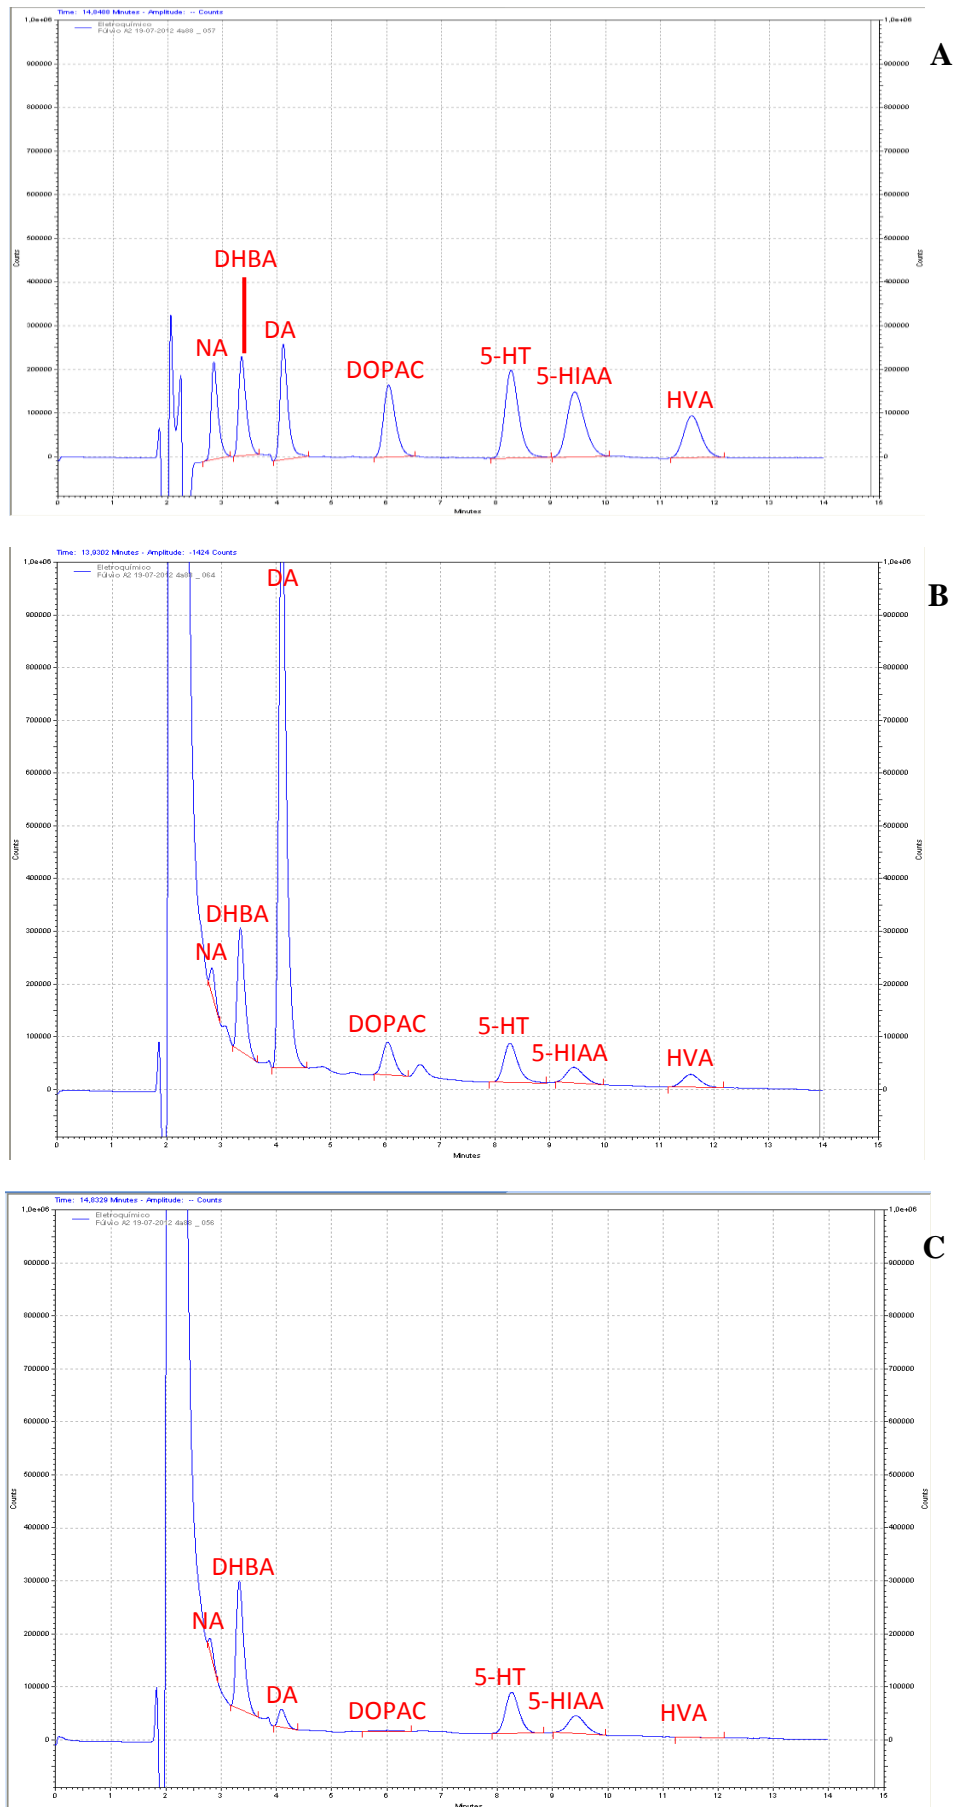

**Figure S1:** Chromatograms obtained in the HPLC analysis for the standard monoamines/metabolites (A) and typical chromatograms of striatum from intact side (B) and lesioned side (C) of rats with 6-OHDA unilateral lesion of right medial forebrain bundle.
