# Supplementary material for: Anticholinesterase and Pro-dopaminergic Effects of Instant Coffee
Source: Preprints.org preprint supplement (doi:10.20944/preprints202209.0287.v1), 2022-09-20
Supplement: Supplementary file 1 [file supplementary › Fig S2.pdf]

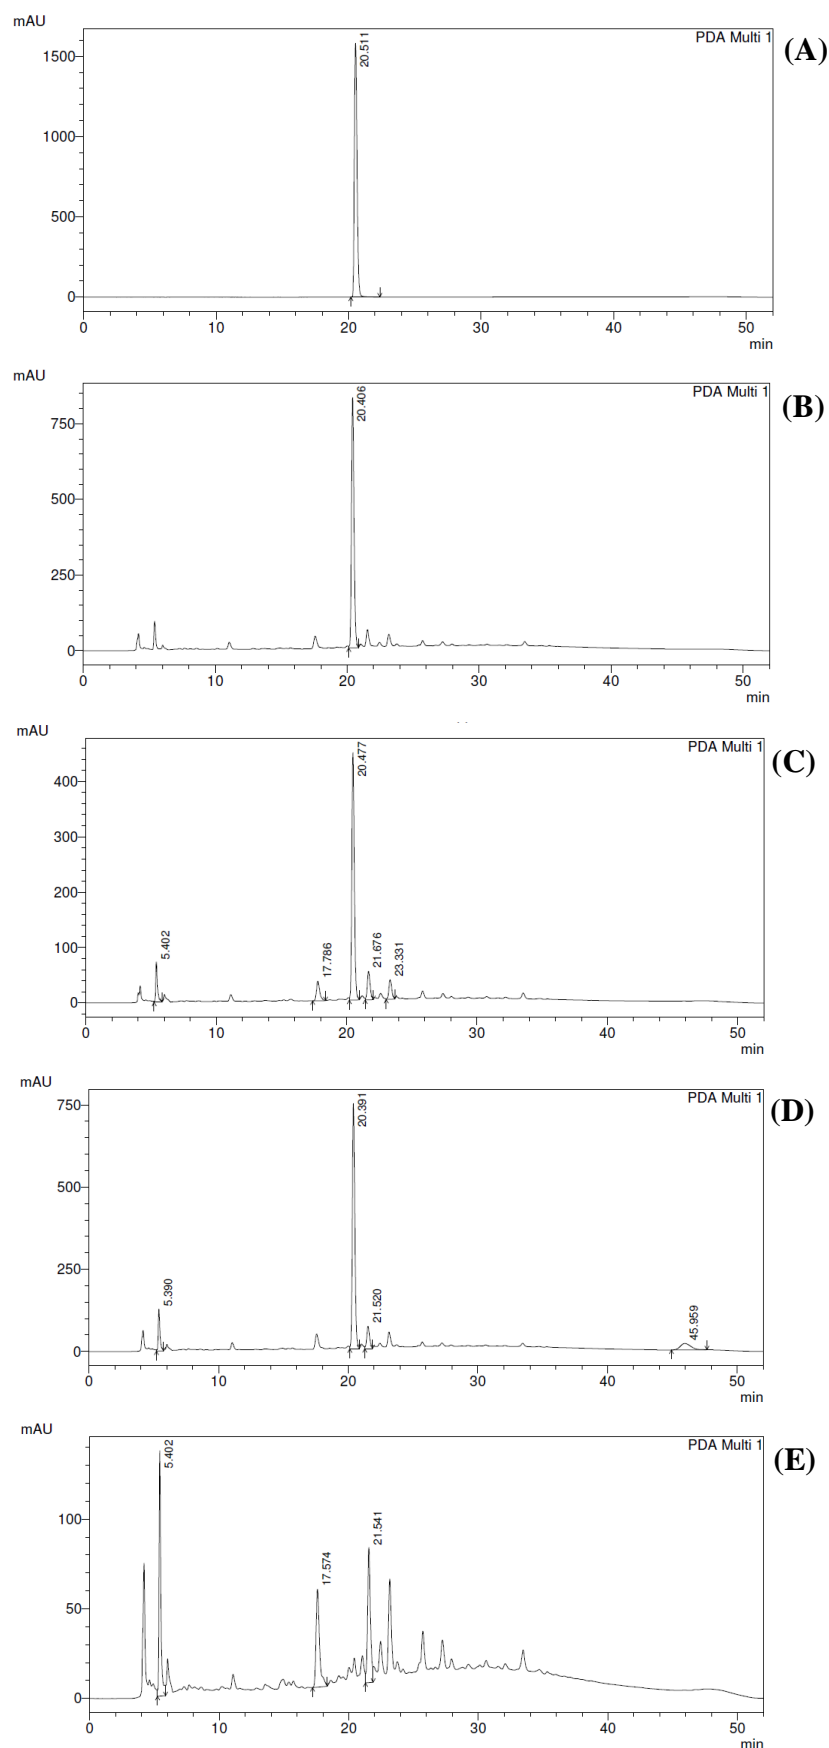

**Figure S2:** Chromatographic profile obtained by PDA multi – 270 nm for caffeine (standard, panel A – at 20.5 min), light roast (B), medium roast (C), dark roast (D), and decaffeinated coffee (E).
